# Supplementary material
Source: MDPI journal article supplement (https://www.mdpi.com/1424-8247/16/7/1019)
Supplement: s1 [file s1]

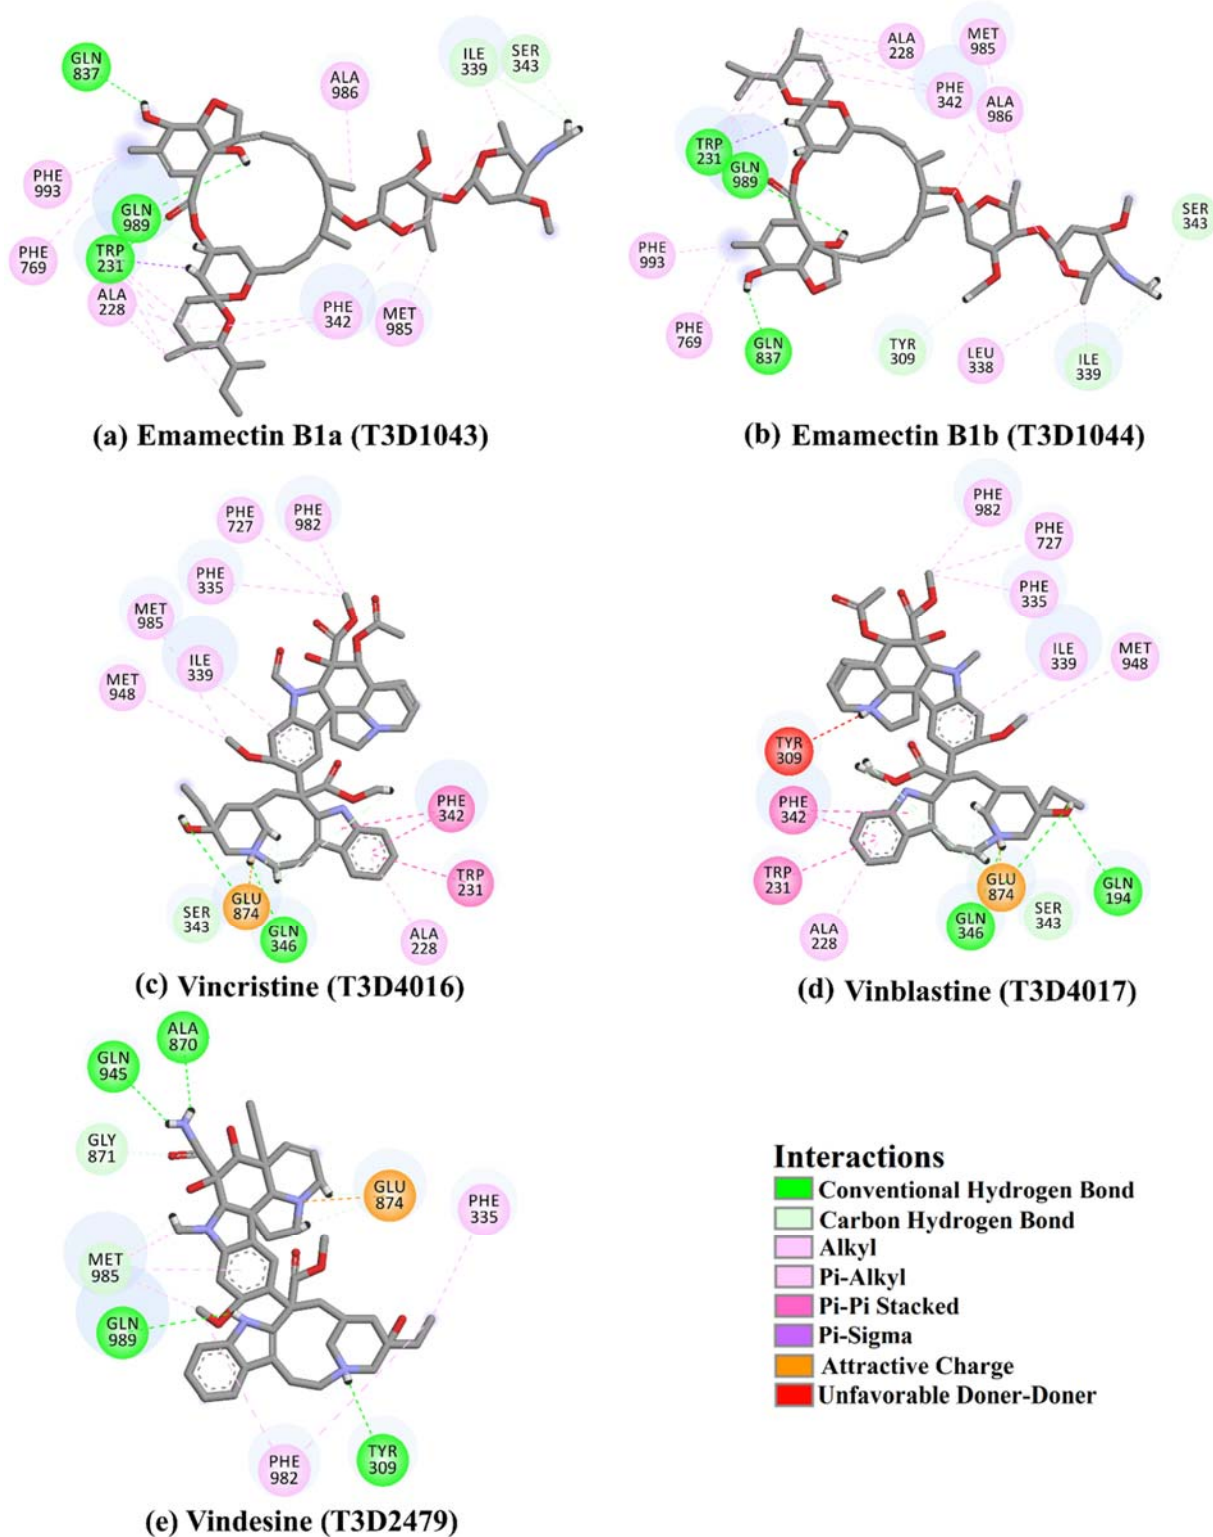

**Figure S1.** 2D molecular interactions of the top five T3DB compounds inside the ABCB1 binding pocket.

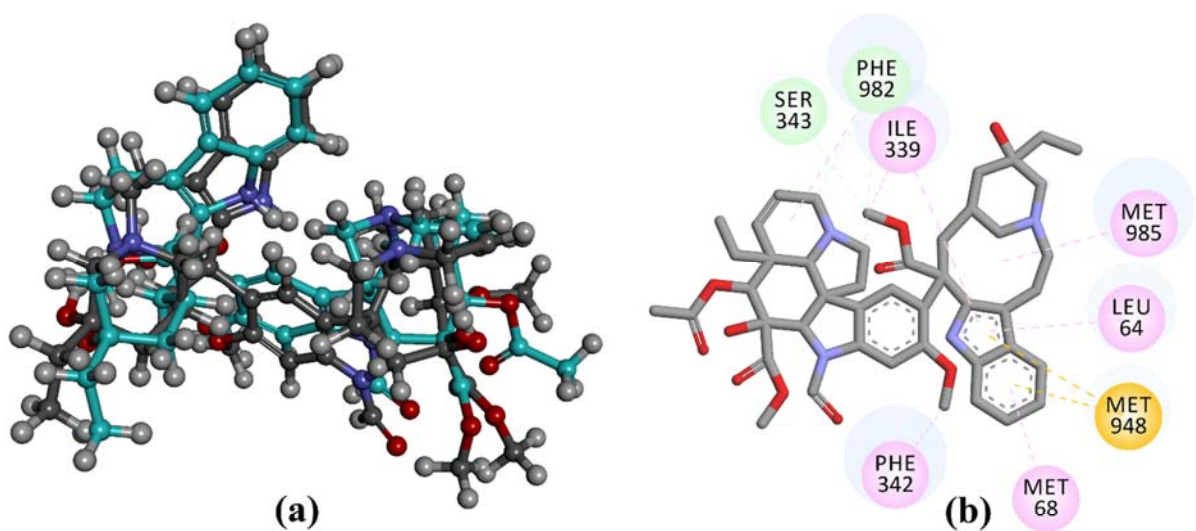

**Vincristine**  
**Docking Score =  $-9.9$  kcal/mol**

### Interactions

|                                                                                                        |                                                                                              |
|--------------------------------------------------------------------------------------------------------|----------------------------------------------------------------------------------------------|
|  Carbon Hydrogen Bond |  Pi-Alkyl   |
|  Alkyl               |  Pi-Sulfur |

**Figure S2.** (a) 3D representation of the predicted docking pose (in cyan) and the experimental pose (in gray), and 2D representation of interactions of the experimental pose of Vincristine inside the ABCB1 binding pocket. The docking score is also presented (in kcal/mol).

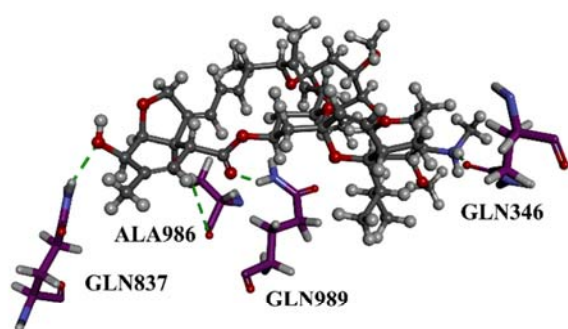

**(a) Emamectin B1a (T3D1043)**

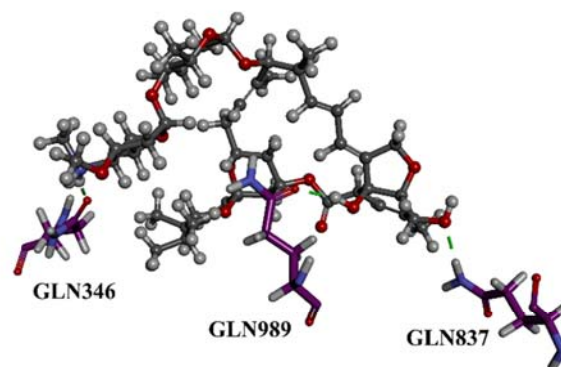

**(b) Emamectin B1b (T3D1044)**

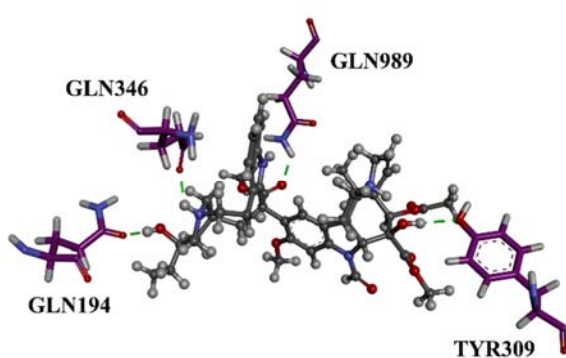

**(c) Vincristine (T3D4016)**

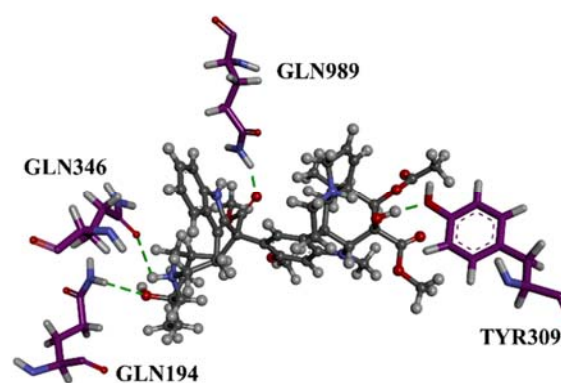

**(d) Vinblastine (T3D4017)**

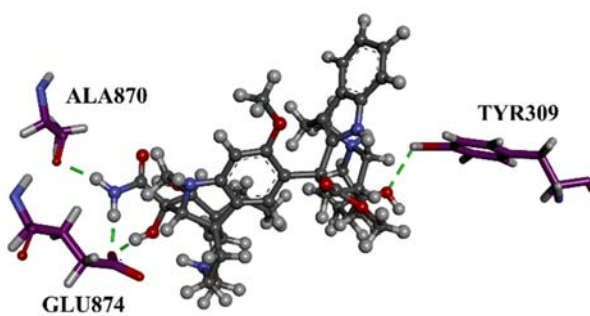

**(e) Vindesine (T3D2479)**

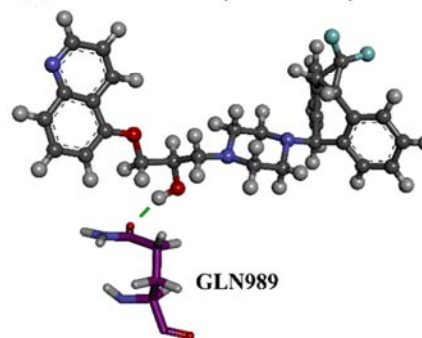

**(f) ZQU**

**Figure S3.** 3D molecular interactions of the top five T3DB compounds and ZQU inside the ABCB1 binding pocket according to the average structures over 100 ns MD simulations (the hydrogen bonds are represented in green dashed lines).

**Table S1.** Estimated docking scores and MM-GBSA binding energies (in kcal/mol) over 1 ns for the top 103 T3DB compounds compared to ZQU inside the ABCB1 binding pocket. <sup>a</sup>

| No. | Toxin Code | Docking Score (kcal/mol) | MM-GBSA Binding Energy (kcal/mol) |
|-----|------------|--------------------------|-----------------------------------|
|     | ZQU        | -8.4                     | -51.2                             |
| 1   | T3D4017    | -10.0                    | -108.2                            |
| 2   | T3D4016    | -9.9                     | -102.7                            |
| 3   | T3D1043    | -11.8                    | -101.4                            |
| 4   | T3D1044    | -12.0                    | -97.3                             |
| 5   | T3D2479    | -8.9                     | -95.5                             |
| 6   | T3D4996    | -12.3                    | -90.9                             |
| 7   | T3D2969    | -9.9                     | -86.4                             |
| 8   | T3D2838    | -9.2                     | -78.2                             |
| 9   | T3D2672    | -12.7                    | -77.1                             |
| 10  | T3D4021    | -9.6                     | -77.5                             |
| 11  | T3D4995    | -13.2                    | -76.0                             |
| 12  | T3D4323    | -10.7                    | -73.5                             |
| 13  | T3D2670    | -9.0                     | -72.3                             |
| 14  | T3D2727    | -9.7                     | -72.2                             |
| 15  | T3D4019    | -9.9                     | -70.7                             |
| 16  | T3D2750    | -9.7                     | -70.0                             |
| 17  | T3D3740    | -11.7                    | -68.5                             |
| 18  | T3D4916    | -11.1                    | -68.5                             |
| 19  | T3D4084    | -10.1                    | -68.3                             |
| 20  | T3D4440    | -9.7                     | -68.1                             |
| 21  | T3D4438    | -9.4                     | -66.7                             |
| 22  | T3D2460    | -9.5                     | -62.4                             |
| 23  | T3D3887    | -9.9                     | -61.7                             |
| 24  | T3D2959    | -9.6                     | -60.7                             |
| 25  | T3D4439    | -9.9                     | -59.6                             |
| 26  | T3D2871    | -8.6                     | -58.5                             |
| 27  | T3D2978    | -9.4                     | -58.1                             |
| 28  | T3D2713    | -9.2                     | -56.9                             |
| 29  | T3D2576    | -9.5                     | -56.7                             |
| 30  | T3D4235    | -9.4                     | -56.0                             |
| 31  | T3D2984    | -9.4                     | -55.8                             |
| 32  | T3D4067    | -8.5                     | -55.2                             |
| 33  | T3D4083    | -9.9                     | -54.8                             |
| 34  | T3D2907    | -8.9                     | -54.1                             |
| 35  | T3D2703    | -8.9                     | -52.7                             |
| 36  | T3D2677    | -8.8                     | -52.5                             |
| 37  | T3D2043    | -8.8                     | -52.4                             |
| 38  | T3D4082    | -9.1                     | -52.1                             |
| 39  | T3D2974    | -10.3                    | -51.8                             |
| 40  | T3D2044    | -8.9                     | -47.4                             |
| 41  | T3D2358    | -9.0                     | -47.3                             |
| 42  | T3D2143    | -9.2                     | -46.9                             |
| 43  | T3D2692    | -9.5                     | -45.6                             |
| 44  | T3D2697    | -9.4                     | -45.4                             |
| 45  | T3D2015    | -9.1                     | -45.2                             |
| 46  | T3D2852    | -8.6                     | -44.8                             |
| 47  | T3D2011    | -9.0                     | -44.6                             |
| 48  | T3D2008    | -9.3                     | -44.2                             |

**Table S1. Continued.**

| No. | Toxin Code | Docking Score (kcal/mol) | MM-GBSA Binding Energy (kcal/mol) |
|-----|------------|--------------------------|-----------------------------------|
| 49  | T3D2012    | -9.4                     | -43.6                             |
| 50  | T3D2134    | -8.5                     | -43.5                             |
| 51  | T3D2483    | -9.9                     | -43.3                             |
| 52  | T3D2006    | -8.6                     | -42.6                             |
| 53  | T3D2680    | -8.7                     | -42.6                             |
| 54  | T3D2041    | -8.6                     | -42.3                             |
| 55  | T3D0631    | -9.3                     | -42.1                             |
| 56  | T3D2234    | -8.7                     | -41.9                             |
| 57  | T3D4910    | -8.5                     | -41.3                             |
| 58  | T3D2007    | -8.7                     | -41.2                             |
| 59  | T3D3895    | -8.5                     | -40.9                             |
| 60  | T3D2164    | -8.5                     | -40.9                             |
| 61  | T3D0588    | -8.5                     | -40.3                             |
| 62  | T3D2017    | -8.9                     | -40.2                             |
| 63  | T3D2139    | -8.6                     | -40.1                             |
| 64  | T3D2917    | -8.7                     | -39.6                             |
| 65  | T3D2228    | -8.5                     | -39.2                             |
| 66  | T3D2324    | -8.6                     | -39.1                             |
| 67  | T3D2001    | -8.7                     | -39.1                             |
| 68  | T3D2162    | -8.6                     | -39.0                             |
| 69  | T3D2796    | -8.5                     | -38.8                             |
| 70  | T3D0571    | -8.6                     | -37.9                             |
| 71  | T3D2753    | -9.0                     | -37.1                             |
| 72  | T3D4240    | -8.7                     | -36.9                             |
| 73  | T3D4283    | -8.7                     | -36.8                             |
| 74  | T3D0556    | -8.8                     | -36.7                             |
| 75  | T3D2014    | -8.9                     | -36.6                             |
| 76  | T3D3875    | -8.8                     | -35.8                             |
| 77  | T3D0546    | -8.5                     | -35.8                             |
| 78  | T3D4282    | -9.6                     | -35.6                             |
| 79  | T3D2010    | -8.6                     | -35.5                             |
| 80  | T3D0557    | -8.8                     | -35.3                             |
| 81  | T3D0580    | -8.9                     | -34.7                             |
| 82  | T3D0632    | -9.2                     | -34.3                             |
| 83  | T3D2009    | -8.6                     | -34.1                             |
| 84  | T3D2158    | -8.5                     | -33.9                             |
| 85  | T3D0542    | -8.5                     | -33.8                             |
| 86  | T3D0512    | -8.6                     | -33.7                             |
| 87  | T3D0569    | -8.8                     | -33.6                             |
| 88  | T3D2003    | -8.6                     | -33.3                             |
| 89  | T3D0526    | -8.6                     | -32.6                             |
| 90  | T3D4923    | -9.7                     | -31.5                             |
| 91  | T3D4242    | -8.6                     | -31.2                             |
| 92  | T3D0015    | -8.8                     | -30.9                             |
| 93  | T3D0547    | -8.5                     | -30.0                             |
| 94  | T3D0174    | -8.7                     | -29.3                             |
| 95  | T3D0009    | -8.8                     | -28.7                             |
| 96  | T3D0636    | -9.2                     | -28.4                             |
| 97  | T3D2825    | -9.3                     | -27.9                             |
| 98  | T3D0629    | -9.0                     | -27.7                             |
| 99  | T3D0622    | -8.7                     | -27.6                             |
| 100 | T3D2012    | -9.4                     | -43.6                             |

**Table S1.** *Continued.*

| No. | Toxin Code | Docking Score (kcal/mol) | MM-GBSA Binding Energy (kcal/mol) |
|-----|------------|--------------------------|-----------------------------------|
| 101 | T3D0070    | −8.5                     | −25.9                             |
| 102 | T3D0010    | −8.5                     | −25.2                             |
| 103 | T3D0062    | −8.5                     | −23.6                             |

<sup>a</sup>Data ranked based on the MM-GBSA binding energy over the 1 ns MD simulations.
